# Supplementary material
Source: PubMed Central journal article supplement (PMC2930450)
Supplement: 1001222107_pnas.201001222SI.pdf [file 1001222107_pnas.201001222SI.pdf]

# Supporting Information

Welch et al. 10.1073/pnas.1001222107

**Table S1. Characteristics of study sites: location of weather stations, and observations included in sample (models without economic variables)**

| Site                                  | Latitude/longitude | Climatic zone      | Years     | Villages/districts | Farms | Observations |
|---------------------------------------|--------------------|--------------------|-----------|--------------------|-------|--------------|
| China (Jinhua, Zhejiang)              | 29°5' N/119°47' E  | Subtropics         | 1998–1999 | 7                  | 25    | 91           |
| India (Aduthurai, Tamil Nadu)         | 11°1' N/79°29' E   | Tropics (subhumid) | 1994–1999 | 4                  | 37    | 214          |
| Indonesia (Sukamandi, Java)           | 6°21' S/107°40' E  | Tropics (humid)    | 1995–1999 | 3                  | 30    | 159          |
| Philippines (Maligaya, Luzon)         | 15°23' N/120°54' E | Tropics (humid)    | 1994–1999 | 4                  | 48    | 361          |
| Thailand (Suphan Buri, Central Plain) | 14°28' N/100°10' E | Tropics (subhumid) | 1994–1998 | 3                  | 31    | 169          |
| Vietnam (Hanoi, Red River Delta)      | 21°1' N/105°53' E  | Subtropics         | 1997–1999 | 3                  | 24    | 144          |
| Vietnam (Omon, Mekong Delta)          | 10°08' N/105°32' E | Tropics (subhumid) | 1994–1999 | 8                  | 32    | 234          |
| Totals                                | —                  | —                  | —         | 32                 | 227   | 1,372        |

**Table S2. Characteristics of study sites: means (SDs) of yield, temperature, and solar radiation**

| Site            | Yield (kg·ha <sup>-1</sup> ) | <i>T</i> <sub>min</sub> (°C) |               |               | <i>T</i> <sub>max</sub> (°C) |               |               | Radiation (megajoules·m <sup>-2</sup> ·d <sup>-1</sup> ) |               |               |
|-----------------|------------------------------|------------------------------|---------------|---------------|------------------------------|---------------|---------------|----------------------------------------------------------|---------------|---------------|
|                 |                              | Vegetative                   | Reproductive  | Ripening      | Vegetative                   | Reproductive  | Ripening      | Vegetative                                               | Reproductive  | Ripening      |
| China           | 6,287.7<br>(1,257.3)         | 22.1<br>(3.6)                | 21.1<br>(1.0) | 20.9<br>(3.9) | 30.2<br>(3.7)                | 28.7<br>(1.2) | 28.2<br>(3.6) | 13.7<br>(8.5)                                            | 12.5<br>(6.8) | 12.0<br>(8.6) |
| India           | 5,450.5<br>(872.8)           | 24.6<br>(1.3)                | 23.4<br>(2.2) | 22.7<br>(2.1) | 33.1<br>(2.9)                | 31.7<br>(3.0) | 31.6<br>(2.2) | 17.4<br>(1.8)                                            | 17.3<br>(1.6) | 18.3<br>(1.5) |
| Indonesia       | 4,852.4<br>(1,614.2)         | 24.1<br>(0.7)                | 23.5<br>(0.8) | 23.0<br>(1.0) | 31.6<br>(1.1)                | 31.3<br>(0.9) | 31.4<br>(1.0) | 17.7<br>(2.7)                                            | 18.0<br>(2.3) | 19.0<br>(2.9) |
| Philippines     | 4,890.5<br>(1,858.6)         | 23.0<br>(1.4)                | 22.7<br>(1.4) | 22.7<br>(1.1) | 30.8<br>(1.2)                | 31.0<br>(1.0) | 31.8<br>(1.0) | 21.0<br>(3.9)                                            | 22.4<br>(3.5) | 22.3<br>(3.8) |
| Thailand        | 5,056.1<br>(923.6)           | 23.4<br>(2.1)                | 23.8<br>(1.4) | 23.8<br>(1.7) | 33.3<br>(1.3)                | 33.8<br>(1.5) | 34.1<br>(2.3) | 16.7<br>(1.7)                                            | 18.1<br>(1.5) | 18.6<br>(1.9) |
| Vietnam (Hanoi) | 5,699.3<br>(1,153.8)         | 21.7<br>(4.7)                | 23.7<br>(2.7) | 24.7<br>(1.1) | 27.6<br>(5.7)                | 29.5<br>(3.4) | 31.3<br>(1.1) | 13.6<br>(3.9)                                            | 16.7<br>(1.3) | 17.1<br>(1.3) |
| Vietnam (Omon)  | 4,951.1<br>(1,362.1)         | 23.3<br>(1.3)                | 23.0<br>(1.3) | 22.8<br>(1.5) | 32.1<br>(1.4)                | 31.2<br>(1.6) | 31.1<br>(1.1) | 21.7<br>(3.7)                                            | 21.4<br>(3.5) | 22.2<br>(3.6) |

Values were calculated across all years and seasons in the sample (Table S1). Values for temperature and radiation are shown by rice-growth phase.

**Table S3. Correlations among weather variables by rice-growth phase**

| Phase        | Variable                | <i>T</i> <sub>min</sub> | <i>T</i> <sub>max</sub> | Radiation      |
|--------------|-------------------------|-------------------------|-------------------------|----------------|
| Vegetative   | <i>T</i> <sub>max</sub> | 0.399 (0.000)           | —                       | —              |
|              | Radiation               | 0.117 (0.000)           | 0.597 (0.000)           | —              |
|              | Rainfall                | 0.034 (0.215)           | -0.284 (0.000)          | -0.324 (0.000) |
| Reproductive | <i>T</i> <sub>max</sub> | 0.567 (0.000)           | —                       | —              |
|              | Radiation               | -0.118 (0.000)          | 0.396 (0.000)           | —              |
|              | Rainfall                | 0.383 (0.000)           | -0.053 (0.052)          | -0.337 (0.000) |
| Ripening     | <i>T</i> <sub>max</sub> | 0.505 (0.000)           | —                       | —              |
|              | Radiation               | 0.055 (0.043)           | 0.412 (0.000)           | —              |
|              | Rainfall                | 0.358 (0.000)           | -0.158 (0.000)          | -0.250 (0.000) |

To match the regression models, correlations were calculated using residual variation in the variables after demeaning them by farm and site/season-years to remove the fixed effects of unobserved factors unique to each farm or common to all farms at a given site in a given season-year. Number of observations = 1,372. *P* values are in parentheses.



**Table S5. Regression results: impacts of weather and economic variables on rice yield ( $\text{kg}\cdot\text{ha}^{-1}$ ) in Model 5 when excluding either solar radiation or  $T_{\text{max}}$  during the ripening phase**

| Variables                       | Full model (Model 5 in Table S4) | Exclude radiation: ripening    | Exclude $T_{\text{max}}$ : ripening |
|---------------------------------|----------------------------------|--------------------------------|-------------------------------------|
| $T_{\text{min}}$ : vegetative   | -185.2 <sup>†</sup><br>(0.011)   | -200.2 <sup>‡</sup><br>(0.007) | -185.9 <sup>†</sup><br>(0.013)      |
| $T_{\text{min}}$ : reproductive | 20.49<br>(0.769)                 | 21.91<br>(0.742)               | 22.26<br>(0.761)                    |
| $T_{\text{min}}$ : ripening     | -322.4 <sup>‡</sup><br>(0.001)   | -328.8 <sup>‡</sup><br>(0.000) | -248.2 <sup>‡</sup><br>(0.006)      |
| Radiation: vegetative           | -106.1 <sup>‡</sup><br>(0.009)   | -126.8 <sup>‡</sup><br>(0.005) | -91.83 <sup>†</sup><br>(0.021)      |
| Radiation: reproductive         | 27.38<br>(0.356)                 | 15.80<br>(0.589)               | 37.45<br>(0.208)                    |
| Radiation: ripening             | 109.4 <sup>†</sup><br>(0.038)    |                                | 138.5 <sup>‡</sup><br>(0.002)       |
| $T_{\text{max}}$ : vegetative   | 193.9 <sup>‡</sup><br>(0.001)    | 190.3 <sup>‡</sup><br>(0.003)  | 180.6 <sup>‡</sup><br>(0.001)       |
| $T_{\text{max}}$ : reproductive | -22.27<br>(0.739)                | -60.66<br>(0.360)              | -15.50<br>(0.817)                   |
| $T_{\text{max}}$ : ripening     | 124.9*<br>(0.087)                | 209.5 <sup>‡</sup><br>(0.001)  |                                     |
| Rainfall: vegetative            | -0.534<br>(0.121)                | -0.743 <sup>†</sup><br>(0.024) | -0.510<br>(0.150)                   |
| Rainfall: reproductive          | 0.311<br>(0.685)                 | 0.0194<br>(0.981)              | 0.290<br>(0.704)                    |
| Rainfall: ripening              | 1.284 <sup>†</sup><br>(0.040)    | 1.117*<br>(0.065)              | 0.922<br>(0.114)                    |
| ln (farm size)                  | -779.5 <sup>‡</sup><br>(0.000)   | -741.8 <sup>‡</sup><br>(0.000) | -799.7 <sup>‡</sup><br>(0.000)      |
| Ratio: rice price/wage          | 7,073 <sup>†</sup><br>(0.047)    | 6,860*<br>(0.060)              | 6,823*<br>(0.057)                   |
| Ratio: rice price/ $N$ price    | 348.6<br>(0.608)                 | 380.1<br>(0.580)               | 441.1<br>(0.521)                    |
| $R^2$                           | 0.600                            | 0.596                          | 0.598                               |
| Observations                    | 1,248                            | 1,248                          | 1,248                               |
| Number of farms                 | 219                              | 219                            | 219                                 |

All models included fixed effects for farms and site/season-years in addition to variables shown in the table. Units for explanatory variables: °C for  $T_{\text{min}}$  and  $T_{\text{max}}$ ,  $\text{MJ}\cdot\text{m}^{-2}\cdot\text{d}^{-1}$  for radiation, mm for rainfall, and ha for farm size. Robust  $P$  values are in parentheses for SEs clustered by village/district.

\* $P < 0.1$ .

<sup>†</sup> $P < 0.05$ .

<sup>‡</sup> $P < 0.01$ .

**Table S6. Equality tests for regression parameters in Models 4 and 5 in Table S4**

| Null hypothesis                                     | P values |         |
|-----------------------------------------------------|----------|---------|
|                                                     | Model 4  | Model 5 |
| Equality across rice-growth phases                  |          |         |
| $T_{\min}$ : vegetative = $T_{\min}$ : reproductive | 0.117    | 0.020   |
| $T_{\min}$ : vegetative = $T_{\min}$ : ripening     | 0.041    | 0.114   |
| $T_{\min}$ : reproductive = $T_{\min}$ : ripening   | 0.012    | 0.007   |
| $T_{\min}$ equal for all three phases               | 0.038    | 0.022   |
| Radiation: vegetative = radiation: reproductive     | 0.013    | 0.001   |
| Radiation: vegetative = radiation: ripening         | 0.012    | 0.003   |
| Radiation: vegetative = radiation: ripening         | 0.870    | 0.957   |
| Radiation: reproductive = radiation: ripening       | 0.144    | 0.115   |
| Radiation equal for all three phases                | 0.026    | 0.002   |
| $T_{\max}$ : vegetative = $T_{\max}$ : reproductive | 0.038    | 0.019   |
| $T_{\max}$ : vegetative = $T_{\max}$ : ripening     | 0.467    | 0.353   |
| $T_{\max}$ : reproductive = $T_{\max}$ : ripening   | 0.198    | 0.189   |
| $T_{\max}$ equal for all three phases               | 0.108    | 0.048   |
| Rainfall: vegetative = rainfall: reproductive       | 0.185    | 0.248   |
| Rainfall: vegetative = rainfall: ripening           | 0.044    | 0.020   |
| Rainfall: reproductive = rainfall: ripening         | 0.238    | 0.205   |
| Rainfall equal for all three phases                 | 0.125    | 0.062   |
| Equality within growth phases                       |          |         |
| $ T_{\min}$ : vegetative = $T_{\max}$ : vegetative  | 0.577    | 0.899   |
| $ T_{\min}$ : ripening = $T_{\max}$ : ripening      | 0.031    | 0.037   |

**Table S7. Regression results: impacts of weather and economic variables on rice yield ( $\text{kg}\cdot\text{ha}^{-1}$ ) for models that included  $T_{\text{ave}}$  instead of  $T_{\min}$  and  $T_{\max}$**

| Variables                         | $T_{\text{ave}}$ only          | Add radiation                 | Add rainfall                   | Add economic variables         |
|-----------------------------------|--------------------------------|-------------------------------|--------------------------------|--------------------------------|
| $T_{\text{ave}}$ : vegetative     | -22.64<br>(0.778)              | 43.29<br>(0.395)              | 31.74<br>(0.558)               | 10.05<br>(0.876)               |
| $T_{\text{ave}}$ : reproductive   | -115.0 <sup>†</sup><br>(0.045) | -38.22<br>(0.556)             | -54.31<br>(0.441)              | -34.26<br>(0.562)              |
| $T_{\text{ave}}$ : ripening       | -45.77<br>(0.578)              | -153.9<br>(0.119)             | -163.4*<br>(0.083)             | -142.9<br>(0.109)              |
| Radiation: vegetative             |                                | -12.43<br>(0.687)             | -27.95<br>(0.311)              | -30.32<br>(0.347)              |
| Radiation: reproductive           |                                | 18.70<br>(0.614)              | 19.03<br>(0.495)               | 28.22<br>(0.291)               |
| Radiation: ripening               |                                | 121.1 <sup>†</sup><br>(0.036) | 118.3 <sup>†</sup><br>(0.027)  | 142.5 <sup>‡</sup><br>(0.004)  |
| Rainfall: vegetative              |                                |                               | -0.820 <sup>†</sup><br>(0.036) | -0.689 <sup>†</sup><br>(0.039) |
| Rainfall: reproductive            |                                |                               | -0.126<br>(0.851)              | -0.119<br>(0.856)              |
| Rainfall: ripening                |                                |                               | 0.435<br>(0.538)               | 0.469<br>(0.433)               |
| ln (farm size)                    |                                |                               |                                | -816.1 <sup>†</sup><br>(0.000) |
| Ratio: rice price/wage            |                                |                               |                                | 7,199 <sup>†</sup><br>(0.050)  |
| Ratio: rice price/ <i>N</i> price |                                |                               |                                | 559.2<br>(0.418)               |
| $R^2$                             | 0.545                          | 0.551                         | 0.554                          | 0.589                          |
| Observations                      | 1,372                          | 1,372                         | 1,372                          | 1,248                          |
| Number of farms                   | 227                            | 227                           | 227                            | 219                            |

All models included fixed effects for farms and site/season-years in addition to variables shown in the table. Units for explanatory variables: °C for  $T_{\min}$  and  $T_{\max}$ ,  $\text{MJ}\cdot\text{m}^{-2}\cdot\text{d}^{-1}$  for radiation, mm for rainfall, and ha for farm size. Robust *P* values are in parentheses for SEs clustered by village/district.

\**P* < 0.1.

<sup>†</sup>*P* < 0.05.

<sup>‡</sup>*P* < 0.01.

**Table S8. Marginal effects of weather variables expressed per SD: regression model that included economic variables**

| Variable  | Growth phase | SD based on residual variation           | Marginal effect (kg·ha <sup>-1</sup> per SD) |
|-----------|--------------|------------------------------------------|----------------------------------------------|
| $T_{min}$ | Vegetative   | 0.42 °C                                  | -78.6                                        |
|           | Ripening     | 0.54 °C                                  | -174.4                                       |
| Radiation | Vegetative   | 1.17 MJ·m <sup>-2</sup> ·d <sup>-1</sup> | -124.1                                       |
|           | Ripening     | 0.90 MJ·m <sup>-2</sup> ·d <sup>-1</sup> | 98.2                                         |
| $T_{max}$ | Vegetative   | 0.63 °C                                  | 122.9                                        |
|           | Ripening     | 0.55 °C                                  | 69.0                                         |
| Rainfall  | Ripening     | 53.3 mm                                  | 68.4                                         |

Marginal effects are shown only for weather variables whose estimated regression parameters were significant at  $P < 0.1$  (see Model 5 in Table S4) and were calculated by multiplying regression parameters by the SDs of the corresponding weather variables. SDs refer to residual variation after removing variation explained by fixed effects for farms and site/season-years.

**Table S9. Quadratic model: significance of linear and quadratic terms, marginal effects, and turning points**

| Variable  | Growth phase | P values of variables |           |       | Marginal effect | Turning point                            | Impact when variable exceeds turning point |
|-----------|--------------|-----------------------|-----------|-------|-----------------|------------------------------------------|--------------------------------------------|
|           |              | Linear                | Quadratic | Joint |                 |                                          |                                            |
| $T_{min}$ | Vegetative   | 0.004                 | 0.002     | 0.000 | -225.4          | 21.5 °C                                  | Yield falls                                |
|           | Reproductive | 0.263                 | 0.262     | 0.527 | 25.3            | 22.7 °C                                  | Yield rises                                |
|           | Ripening     | 0.985                 | 0.792     | 0.001 | -343.4          | *                                        | Yield falls                                |
| Radiation | Vegetative   | 0.262                 | 0.108     | 0.084 | -77.5           | 12.8 MJ·m <sup>-2</sup> ·d <sup>-1</sup> | Yield falls                                |
|           | Reproductive | 0.059                 | 0.022     | 0.015 | 29.7            | 17.5 MJ·m <sup>-2</sup> ·d <sup>-1</sup> | Yield rises                                |
|           | Ripening     | 0.816                 | 0.816     | 0.062 | 107.4           | *                                        | Yield rises                                |
| $T_{max}$ | Vegetative   | 0.001                 | 0.000     | 0.000 | 139.6           | 29.9 °C                                  | Yield rises                                |
|           | Reproductive | 0.977                 | 0.988     | 0.730 | -56.5           | 7.7 °C                                   | Yield falls                                |
|           | Ripening     | 0.232                 | 0.299     | 0.144 | 122.9           | 37.3 °C                                  | Yield falls                                |
| Rainfall  | Vegetative   | 0.387                 | 0.589     | 0.335 | -0.66           | 768 mm                                   | Yield rises                                |
|           | Reproductive | 0.120                 | 0.208     | 0.290 | 0.84            | 341 mm                                   | Yield falls                                |
|           | Ripening     | 0.109                 | 0.515     | 0.049 | 1.80            | 548 mm                                   | Yield falls                                |

Model also included economic variables and fixed effects for farms and site/season-years. Significance of individual variables was based on robust SEs clustered by villages/districts; joint significance of linear and quadratic terms was determined using  $F$  tests. Marginal effects were calculated at means of the weather variables and can be compared with parameter estimates for the corresponding weather variables in Model 5 in Table S4. An asterisk denotes a monotonic function over the range of positive values.

**Table S10. Observed weather trends at the end of the 20th century at study sites by quarter of the year**

| Site            | $T_{min}$ (°C·decade <sup>-1</sup> ) |        |        |        | $T_{max}$ (°C·decade <sup>-1</sup> ) |       |       |       | Surface radiation (%·y <sup>-1</sup> ) |         |         |        |
|-----------------|--------------------------------------|--------|--------|--------|--------------------------------------|-------|-------|-------|----------------------------------------|---------|---------|--------|
|                 | DJF                                  | MAM    | JJA    | SON    | DJF                                  | MAM   | JJA   | SON   | DJF                                    | MAM     | JJA     | SON    |
| China           | 0.62*                                | 0.53*  | 0.15   | 0.28   | 0.58                                 | 0.72* | 0.04  | 0.32  | -0.09%                                 | 0.21%   | -0.59%  | 0.25%  |
| India           | 0.19                                 | 0.10   | 0.26   | 0.39*  | 0.39*                                | 0.09  | 0.42* | 0.30* | 0.31%                                  | 0.16%   | 0.43%*  | -0.18% |
| Indonesia       | 0.39*                                | 0.19   | 0.22*  | 0.23*  | 0.13                                 | 0.05  | 0.11  | 0.05  | -0.24%*                                | -0.15%  | -0.17%  | -0.10% |
| Philippines     | 0.55*                                | 0.36*  | 0.24*  | 0.25*  | 0.05                                 | -0.17 | 0.02  | 0.12  | -0.51%*                                | -0.36%* | -0.15%  | -0.23% |
| Thailand        | 0.63*                                | 0.00   | 0.10   | 0.12   | 0.16                                 | -0.06 | 0.38* | 0.28* | -0.35%*                                | -0.30%* | -0.40%* | -0.18% |
| Vietnam (north) | 0.59*                                | 0.44*  | 0.10   | 0.21   | 0.13                                 | -0.38 | 0.00  | 0.23  | -0.21%                                 | -0.25%  | -0.65%* | 0.18%  |
| Vietnam (south) | 0.03                                 | -0.28* | -0.32* | -0.34* | 0.27                                 | 0.11  | 0.46* | 0.38* | -0.50%*                                | -0.22%  | -0.29%  | -0.10% |

DJF, December to February; MAM, March to May; JJA, June to August; SON, September to November. Time periods for estimating trends: temperature, 1979–2004; radiation, 1983–2004.

\*Trends that were significant at  $P < 0.05$ .

**Table S11. Projected changes in decadal means of weather variables between 1991–2000 and 2091–2100 at study sites by quarter of the year**

| Site            | $T_{min}$ (°C) |       |       |       | $T_{max}$ (°C) |      |      |      | Surface radiation (MJ·m <sup>-2</sup> ·d <sup>-1</sup> ) |        |        |        |
|-----------------|----------------|-------|-------|-------|----------------|------|------|------|----------------------------------------------------------|--------|--------|--------|
|                 | DJF            | MAM   | JJA   | SON   | DJF            | MAM  | JJA  | SON  | DJF                                                      | MAM    | JJA    | SON    |
| China           | 3.00           | 1.29  | 1.96  | 3.44* | 3.77           | 1.58 | 2.08 | 3.01 | -0.07                                                    | 0.11   | -0.50  | -2.85  |
| India           | 2.16*          | 3.56  | 3.58  | 3.09  | 2.08           | 4.16 | 4.39 | 3.36 | 1.40                                                     | -6.99  | -7.64  | -7.84  |
| Indonesia       | 2.27*          | 2.43* | 2.46* | 2.48* | 2.00           | 2.03 | 2.11 | 2.40 | -11.88                                                   | -3.82  | -8.33  | -6.28  |
| Philippines     | 2.97*          | 3.31* | 3.28* | 3.13* | 0.32           | 3.03 | 3.24 | 2.79 | -28.62                                                   | -16.94 | -15.30 | -16.38 |
| Thailand        | 2.16*          | 3.46* | 3.20* | 2.96* | 1.37           | 3.25 | 3.08 | 2.62 | -8.86                                                    | -14.97 | -15.43 | -17.76 |
| Vietnam (north) | 1.83*          | 2.25  | 2.84* | 2.98* | 1.28           | 2.40 | 2.72 | 2.46 | -7.93                                                    | -13.50 | -9.40  | -4.00  |
| Vietnam (south) | 2.06*          | 3.02* | 2.92* | 2.80* | 1.17           | 2.95 | 2.75 | 2.60 | -8.00                                                    | -16.61 | -10.43 | -11.91 |

Projections are from climate simulations conducted for the Fourth Assessment Report of the Intergovernmental Panel on Climate Change. They refer to scenario A1B, which was the scenario used in the report's regional climate projections, and were generated by the Geophysical Fluid Dynamics Laboratory (GFDL) model.

\*Cases where  $T_{min}$  is projected to increase more than  $T_{max}$ .

**Table S12. Regression results: alternative specifications of fixed effects**

| Variables                 | FE: farm, site/season-year     | RE: farm, FE: site/season-year | FE: site/season-year only      | FE: farm only                  | FE: none                       |
|---------------------------|--------------------------------|--------------------------------|--------------------------------|--------------------------------|--------------------------------|
| $T_{min}$ : vegetative    | -185.2 <sup>†</sup><br>(0.011) | -170.3 <sup>†</sup><br>(0.015) | -155.4*<br>(0.091)             | -89.92<br>(0.290)              | -92.68<br>(0.276)              |
| $T_{min}$ : reproductive  | 20.49<br>(0.769)               | 35.71<br>(0.652)               | 83.42<br>(0.395)               | -9.133<br>(0.912)              | 4.890<br>(0.953)               |
| $T_{min}$ : ripening      | -322.4 <sup>‡</sup><br>(0.001) | -373.0 <sup>‡</sup><br>(0.000) | -381.6 <sup>‡</sup><br>(0.004) | -160.7<br>(0.112)              | -92.82<br>(0.368)              |
| Radiation: vegetative     | -106.1 <sup>‡</sup><br>(0.009) | -132.0 <sup>‡</sup><br>(0.000) | -147.6 <sup>‡</sup><br>(0.000) | -53.84*<br>(0.050)             | -95.75 <sup>‡</sup><br>(0.001) |
| Radiation: reproductive   | 27.38<br>(0.356)               | 11.27<br>(0.705)               | -1.203<br>(0.972)              | -3.644<br>(0.913)              | -11.84<br>(0.819)              |
| Radiation: ripening       | 109.4 <sup>†</sup><br>(0.038)  | 133.9 <sup>†</sup><br>(0.024)  | 188.5 <sup>†</sup><br>(0.013)  | 46.77<br>(0.182)               | 71.30*<br>(0.096)              |
| $T_{max}$ : vegetative    | 193.9 <sup>‡</sup><br>(0.001)  | 215.5 <sup>‡</sup><br>(0.000)  | 231.2 <sup>‡</sup><br>(0.000)  | 147.4 <sup>†</sup><br>(0.034)  | 150.2 <sup>†</sup><br>(0.048)  |
| $T_{max}$ : reproductive  | -22.27<br>(0.739)              | 6.851<br>(0.914)               | 29.86<br>(0.680)               | -77.87<br>(0.348)              | -99.67<br>(0.288)              |
| $T_{max}$ : ripening      | 124.9*<br>(0.087)              | 98.73<br>(0.251)               | -2.296<br>(0.984)              | 75.98<br>(0.448)               | 4.097<br>(0.967)               |
| Rainfall: vegetative      | -0.534<br>(0.121)              | -0.842 <sup>†</sup><br>(0.036) | -1.010 <sup>†</sup><br>(0.046) | -0.836*<br>(0.053)             | -1.549 <sup>†</sup><br>(0.000) |
| Rainfall: reproductive    | 0.311<br>(0.685)               | 0.256<br>(0.689)               | 0.256<br>(0.708)               | -1.662 <sup>†</sup><br>(0.019) | -1.176*<br>(0.085)             |
| Rainfall: ripening        | 1.284 <sup>†</sup><br>(0.0403) | 1.089<br>(0.138)               | 0.576<br>(0.526)               | -0.973<br>(0.294)              | -1.365<br>(0.172)              |
| ln (farm size)            | -779.5 <sup>‡</sup><br>(0.000) | -228.7 <sup>†</sup><br>(0.016) | -167.4*<br>(0.059)             | -742.4 <sup>‡</sup><br>(0.002) | -201.1*<br>(0.073)             |
| Ratio: rice price/wage    | 7,073 <sup>†</sup><br>(0.047)  | 7,813 <sup>†</sup><br>(0.014)  | 7,794 <sup>†</sup><br>(0.024)  | 359.6<br>(0.819)               | 861.3<br>(0.566)               |
| Ratio: rice price/N price | 348.6<br>(0.608)               | 857.2<br>(0.212)               | 1,442*<br>(0.069)              | 645.5 <sup>†</sup><br>(0.030)  | 366.2<br>(0.287)               |
| $R^2$                     | 0.600                          | —                              | 0.512                          | 0.294                          | 0.224                          |
| Observations              | 1,248                          | 1,248                          | 1,248                          | 1,248                          | 1,248                          |
| Number of farms           | 219                            | 219                            | 219                            | 219                            | 219                            |

Model in first column is the same as Model 5 in Table S4 and is included for reference. FE, fixed effects; RE, random effects, included in just the second model. Units for explanatory variables: °C for  $T_{min}$  and  $T_{max}$ , MJ·m<sup>-2</sup>·d<sup>-1</sup> for radiation, mm for rainfall, and ha for farm size. Robust P values are in parentheses for SEs clustered by village/district.

\*P < 0.1.

<sup>†</sup>P < 0.05.

<sup>‡</sup>P < 0.01.
